# Supplementary material
Source: PubMed Central journal article supplement (PMC4529088)
Supplement: Supp_Table1.pdf [file Supp_Table1.pdf]

## Supplementary Data

SUPPLEMENTARY TABLE S1. THE SEQUENCES OF THE PRIMERS FOR REVERSE TRANSCRIPTION  
POLYMERASE CHAIN REACTION IN THE EXPERIMENT

| <i>Primer</i> | <i>Sequence</i>                                                                             |
|---------------|---------------------------------------------------------------------------------------------|
| ALP           | Forward: 5'-GCC TTT GAG GTT TTT GGT CA-3'<br>Reverse: 5'-AAC CCA GAC ACA AGC ATT CC-3'      |
| BSP           | Forward: 5'-GAC TTT TGA GTT AGC GGC ACT-3'<br>Reverse: 5'-CCG CCA GCT CGT TTT CAT C-3'      |
| OCN           | Forward: 5'-GCC GGA GTC TGT TCA CTA CC-3'<br>Reverse: 5'-GCG CTC TGT CTC TCT GAC CT-3'      |
| Runx2         | Forward: 5'-AAC GAT CTG AGA TTT GTG GGC-3'<br>Reverse: 5'-CCT GCG TGG GAT TTC TTG GTT-3'    |
| SATB2         | Forward: 5'-AGG CCC AAG GAA TAA TCA AGC-3'<br>Reverse: 5'-GCG TCA CAA CGT GAT AGA CAT C-3'  |
| OSX           | Forward: 5'-ATG GCG TCC TCT CTG CTT G-3'<br>Reverse: 5'-TGAAAGGTCAGCGTATGGCTT-3'            |
| PHF8          | Forward: 5'-ACT TCG GGG CAG AAC TTT TGA-3'<br>Reverse: 5'-CAG TGG GCT TCA GAA TCA CTT-3'    |
| GAPDH         | Forward: 5'-AGG TCG GTG TGA ACG GAT TTG-3'<br>Reverse: 5'-TGT AGA CCA TGT AGT TGA GGT CA-3' |
