# Supplementary material
Source: PubMed Central journal article supplement (PMC4529088)
Supplement: Supp_Table2.pdf [file Supp_Table2.pdf]

SUPPLEMENTARY TABLE S2. THE SEQUENCES OF THE PRIMERS FOR QCHIP IN THE EXPERIMENT

| <i>Primer</i> | <i>Sequence</i>                                                                              |
|---------------|----------------------------------------------------------------------------------------------|
| SATB2 TSS     | Forward: 5'-TTC AGA CAG ACC GTG AGC AG-3'<br>Reverse: 5'-AGA ACA GCC GGG GAA CTT AG-3'       |
| GAPDH         | Forward: 5'-CCT CTG CGC CCT TGA GCT AGG A-3'<br>Reverse: 5'-CAC AAG AAG ATG CGG CCG TCT C-3' |
